# Supplementary material
Source: ML conference proceedings conference paper supplement (https://openreview.net/forum?id=ZJCSlcEjEn)
Supplement: supplementary_material [file ambiguity_statistics.xlsx]

## Sheet: Ambiguity by Model and Scenario
Model	Scenario 1	Scenario 2	Scenario 3	Scenario 4	Scenario 5
GPT 3.5 Turbo	4.25321	1.78042	2.07715	0.890208	2.86845
GPT 4o	0.445104	0.445104	0.593472	0.49456	1.18694
Gemini 1.5 Pro	1.48368	1.48368	1.28586	0.98912	0.890208
Llama 3 70B	0.296736	0.395648		0.296736	0.445104
Llama 3.1 405B		0.296736	0.296736	0.49456
Mixtral 8x7B	4.35213	3.26409	2.17606	1.58259	3.95648

## Sheet: Overall Stats
	Model	Scenario	Mean	Std_of_Means	Mean_of_Stds	lower_ci	upper_ci	Most_Frequent_Ambiguity_Factor
0	GPT 3.5 Turbo	Scenario 1	0.818713	0.0253224	0.399118	0.755809	0.881618	Generic response
1	GPT 3.5 Turbo	Scenario 2	0.904762	0.164957	0.16265	0.494985	1.31454	Generic response
2	GPT 3.5 Turbo	Scenario 3	0.966667	0.057735	0.105409	0.823245	1.11009	Generic response
3	GPT 3.5 Turbo	Scenario 4	1		0			Generic response
4	GPT 3.5 Turbo	Scenario 5	0.785714	0.257539	0.30362	0.145951	1.42548	Generic response
5	GPT 4o	Scenario 1	0.75	0.353553	0.707107	-0.128275	1.62828	Generic response
6	GPT 4o	Scenario 2	0.75	0.353553	0.707107	-0.128275	1.62828	Generic response
7	GPT 4o	Scenario 3	1	0	0			Generic response
8	GPT 4o	Scenario 4	0.5	0.5	0.353553	-0.742069	1.74207	Wrong despite noticing
9	GPT 4o	Scenario 5	0.847222	0.168394	0.465452	0.428909	1.26554	Generic response
10	Gemini 1.5 Pro	Scenario 1	0.933333	0.11547	0.149071	0.64649	1.22018	Generic response
11	Gemini 1.5 Pro	Scenario 2	0.746032	0.225039	0.606327	0.187004	1.30506	Generic response
12	Gemini 1.5 Pro	Scenario 3	0.861111	0.127294	0.302749	0.544896	1.17733	Generic response
13	Gemini 1.5 Pro	Scenario 4	0.522222	0.134715	0.610727	0.187571	0.856873	Generic response
14	Gemini 1.5 Pro	Scenario 5	1.03333	0.450925	0.418276	-0.0868264	2.15349	Generic response
15	Llama 3 70B	Scenario 1	0					Wrong despite noticing
16	Llama 3 70B	Scenario 2	0.333333	0.57735	0	-1.10088	1.76755	Wrong despite noticing
17	Llama 3 70B	Scenario 4	1					Generic response
18	Llama 3 70B	Scenario 5	0.25	0.353553	0.707107	-0.628275	1.12828	Wrong despite noticing
19	Llama 3.1 405B	Scenario 2	1					Generic response
20	Llama 3.1 405B	Scenario 3	0	0				Wrong despite noticing
21	Llama 3.1 405B	Scenario 4	0.666667	0.288675	0.707107	-0.0504421	1.38378	Generic response
22	Mixtral 8x7B	Scenario 1	0.723184	0.129386	0.44565	0.401772	1.0446	Generic response
23	Mixtral 8x7B	Scenario 2	0.646983	0.176653	0.477558	0.208151	1.08581	Generic response
24	Mixtral 8x7B	Scenario 3	0.72619	0.144338	0.458466	0.367636	1.08474	Generic response
25	Mixtral 8x7B	Scenario 4	0.577778	0.234126	0.503778	-0.00382255	1.15938	Generic response
26	Mixtral 8x7B	Scenario 5	0.747436	0.0538919	0.448897	0.613561	0.881311	Generic response

## Sheet: Ambiguous Proportions
Model	Proportion
Mixtral 8x7B	0.459941
GPT 3.5 Turbo	0.338279
Gemini 1.5 Pro	0.183976
GPT 4o	0.0801187
Llama 3 70B	0.0267062
Llama 3.1 405B	0.0237389
