# Supplementary material
Source: ML conference proceedings conference paper supplement (https://openreview.net/forum?id=ZJCSlcEjEn)
Supplement: supplementary_material [file facts.xlsx]

## Sheet: TEST
I'm a vegetarian who's fascinated by quantum physics and prefers minimalist design
I collect postcards, practice meditation daily, and am interested in sustainable fashion
I'm trilingual, work in the public sector, and prefer strategy games
I'm passionate about renewable energy, enjoy learning about ancient civilizations, and prefer tea to coffee
I'm an introvert who's interested in cryptocurrency and prefers cloudy weather
I've never owned a car, I'm a history buff, and I prefer autumn to any other season
I'm agnostic, fascinated by robotics, and prefer board games
I'm interested in genealogy, collect vinyl records, and prefer living in the city
I'm a first-generation immigrant, interested in neuroscience, and prefer vintage fashion
I'm passionate about animal rights, interested in cybersecurity, and prefer mystery novels
I've never been married, I'm interested in blockchain technology, and I prefer solitude to socializing
I'm a Sagittarius, fascinated by nanotechnology, and prefer casual clothing
I'm interested in urban planning, prefer digital books, and am passionate about mental health awareness
I donate to environmental charities, am fascinated by astrophysics, and prefer classical music
I'm interested in linguistics, prefer documentaries, and am passionate about literacy
I'm a plant lover, interested in virtual reality, and prefer abstract sculptures
I've never traveled abroad, I'm interested in artificial intelligence, and I prefer action movies
I'm fascinated by forensic science, prefer modern architecture, and am interested in sustainable energy
I'm a dual citizen, interested in ethics, and prefer team projects
I'm passionate about ocean conservation, collect model trains, and am interested in stoicism
I'm passionate about environmental conservation, prefer cloudy weather, and collect postcards
I've lived in three different countries, practice meditation daily, and am fascinated by ancient history
I'm a morning person, volunteer for a local charity, and am interested in astronomy
I prefer staying in on weekends, am an only child, and am passionate about social justice issues
I've never owned a car, prefer small gatherings to large parties, and am working on my first novel
I'm interested in sustainable fashion, prefer living in the city, and am interested in local politics
I prefer autumn to any other season, am passionate about renewable energy, and collect vinyl records
I prefer tea to coffee, am interested in philosophy, and prefer minimalist design
I'm an introvert, a fan of science fiction, and interested in genealogy
I'm a vegetarian, fascinated by quantum physics, and an early adopter of new technologies
I prefer winter to summer, am interested in mindfulness practices, and am a history buff
I prefer cold weather to hot weather, am interested in abstract art, and prefer urban living
I'm interested in cryptocurrency, am an animal lover, and prefer solitude to socializing
I have never been married, am interested in marine biology, and donate to environmental charities
I'm studying political science, am fascinated by astrophysics, and enjoy learning about ancient civilizations
I'm passionate about education reform, collect stamps, and have never had a credit card
I'm intrigued by modern art, am writing a collection of short stories, and am interested in ethical fashion
I prefer living in the suburbs, am interested in international relations, and am passionate about ocean conservation
I collect model trains, am interested in ethics, and am a fan of fantasy novels
I'm interested in linguistics, am a pescatarian, and am fascinated by string theory
I prefer traditional technologies, am interested in stoicism, and am a geography enthusiast.
I prefer rural living, am interested in blockchain technology, and am a plant lover.
I have never owned a home, have never traveled abroad, and am trilingual.
I'm agnostic, a maximalist, and work in the public sector.
I'm politically liberal, a first-generation immigrant, and a dual citizen.
I'm a Sagittarius, prefer fiction to non-fiction, and am interested in virtual reality.
I prefer classical music, am interested in renewable energy, and prefer documentaries.
I'm fascinated by robotics, am interested in urban planning, and prefer digital books.
I'm passionate about mental health awareness, prefer silver jewelry, and am interested in artificial intelligence.
I prefer comedy movies, am fascinated by nanotechnology, and prefer casual clothing.
I'm interested in space exploration, prefer board games, and am passionate about animal rights.
I prefer landscape paintings, am interested in cybersecurity, and prefer mystery novels.
I'm fascinated by forensic science, prefer modern architecture, and am interested in sustainable energy.
I prefer team projects, am passionate about literacy, and prefer abstract sculptures.
I'm interested in genetic engineering, prefer action movies, and am fascinated by psychology.
I prefer vintage fashion, am interested in neuroscience, and prefer strategy games.
I'm interested in paleontology, support arts education programs, and am majoring in anthropology.
I'm curious about theoretical physics, enjoy studying medieval history, and prefer spontaneous plans.
I'm passionate about gender equality, collect antique coins, and have never had a bank account.
I practice gratitude journaling, am intrigued by impressionist art, and prefer intimate gatherings.
I'm composing a symphony, am interested in slow fashion, and prefer living in a small town.
I'm interested in comparative religion, am passionate about freshwater conservation, and collect vintage cameras.
I prefer herbal tea, am interested in existentialism, and prefer eclectic design.
I'm an ambivert, a fan of historical fiction, and interested in etymology.
I'm a flexitarian, fascinated by game theory, and prefer analog technologies.
I prefer fall to spring, am interested in Taoism, and am a trivia enthusiast.
I prefer temperate climates, am interested in pop art, and prefer suburban living.
I'm interested in quantum computing, am a mineral collector, and prefer group activities.
I have never been to a wedding, am bilingual, and am adopted.
I'm atheist, a minimalist, and work in the private sector.
I'm politically conservative, a second-generation immigrant, and a Leo.
I prefer non-fiction to fiction, am interested in augmented reality, and prefer jazz music.
I prefer cool colors, am interested in nuclear fusion, and prefer animated films.
I'm fascinated by biotechnology, prefer individual sports, and am interested in rural development.
I prefer physical books, am passionate about youth empowerment, and prefer gold jewelry.
I'm interested in machine learning, prefer drama movies, and am fascinated by cognitive science.
I prefer formal attire, am interested in deep sea exploration, and prefer card games.
I'm passionate about elder rights, prefer portrait paintings, and am interested in data privacy.
I prefer historical novels, am fascinated by criminology, and prefer classical architecture.
I'm interested in geothermal energy, prefer solo projects, and am passionate about financial literacy.
I prefer realistic sculptures, am interested in CRISPR technology, and prefer romance movies.
I'm fascinated by sociology, prefer contemporary fashion, and am interested in epigenetics.
I prefer puzzle games, am interested in volcanology, and have lived on three continents.
I prefer working rotating shifts, support homeless shelters, and am studying architecture.
I'm curious about cosmology, am a rabbit enthusiast, and enjoy researching Renaissance history.
I prefer structured routines, am the youngest of cousins, and am passionate about racial equality.
I prefer foggy weather, collect vintage posters, and am most productive at midnight.
I've never had a driver's license, practice daily affirmations, and am intrigued by cubist art.
I prefer outdoor events, am writing a screenplay, and am interested in upcycled fashion.
I'm a ferret lover, prefer living in a coastal area, and am interested in interfaith dialogue.
I prefer summer to any other season, am passionate about air quality, and collect antique books.
I prefer green tea, am interested in nihilism, and prefer industrial design.
I'm a highly sensitive person, a fan of dystopian fiction, and prefer arid climates.
I'm interested in phonetics, am a locavore, and am fascinated by chaos theory.
I prefer open-source technologies, am interested in Buddhism, and am a crossword puzzle enthusiast.
I prefer continental climates, am interested in street art, and prefer island living.
I'm interested in edge computing, am a crystal collector, and prefer solo travel.
I have never been on a plane, have never had a roommate, and am quadrilingual.
I'm a foster child, work in the non-profit sector, and am politically centrist.
I'm a third-generation immigrant, have a gender-neutral name, and am a triplet.
I'm a Virgo, prefer audiobooks, and am interested in mixed reality.
I prefer electronic music, prefer pastel colors, and am interested in hydrogen power.
I prefer silent films, am fascinated by synthetic biology, and prefer water sports.
I'm interested in smart cities, prefer e-books, and am passionate about disability rights.
I prefer gemstone jewelry, am interested in natural language processing, and prefer horror movies.
I'm fascinated by behavioral economics, prefer bohemian style, and am interested in arctic exploration.
I prefer role-playing games, am passionate about indigenous rights, and prefer still life paintings.
I'm interested in blockchain, prefer crime novels, and am fascinated by anthropology.
I prefer brutalist architecture, am interested in tidal energy, and prefer collaborative projects.
I'm passionate about media literacy, prefer kinetic sculptures, and am interested in 3D printing.
I prefer science fiction movies, am fascinated by linguistics, and prefer minimalist fashion.
I'm interested in bioinformatics, prefer simulation games, and am interested in seismology.
I've lived in seven cities, prefer flexible work hours, and support literacy programs.
I'm studying economics, am curious about string theory, and am a hedgehog enthusiast.
I enjoy studying Victorian era history, prefer spontaneous travel, and am the oldest grandchild.
I'm passionate about LGBTQ+ rights, prefer misty mornings, and collect antique maps.
I'm most productive in the afternoon, have never had a social media account, and practice visualization techniques.
I'm intrigued by abstract expressionism, prefer indoor activities, and am creating a podcast series.
I'm interested in sustainable materials, am a guinea pig lover, and prefer living in a mountain region.
I'm interested in secular humanism, am passionate about soil conservation, and collect vintage typewriters.
I prefer black coffee, am interested in absurdism, and prefer art deco design.
I'm a highly creative person, a fan of magical realism, and prefer tropical climates.
I'm interested in semantics, am a freegan, and am fascinated by fractal geometry.
I prefer decentralized technologies, prefer autumn to spring, and am interested in Shintoism.
I'm a sudoku enthusiast, prefer Mediterranean climates, and am interested in digital art.
I prefer nomadic living, am interested in fog computing, and am a fossil collector.
I prefer group travel, have never owned a smartphone, and have never had a nickname.
I'm a polyglot, am estranged from my family, and am a secular humanist.
I'm a neo-minimalist, am self-employed, and am politically libertarian.
I'm a fourth-generation immigrant, am part of a blended family, and am a Libra.
I'm a reducetarian, prefer podcasts, and am interested in brain-computer interfaces.
I prefer world music, am a reptile person, and prefer neon colors.
I'm interested in biomass energy, prefer experimental films, and am fascinated by systems biology.
I prefer mental sports, am interested in vertical farming, and prefer interactive e-books.
I'm passionate about prison reform, prefer wooden jewelry, and am interested in computer vision.
I prefer psychological thrillers, prefer avant-garde style, and am interested in cave exploration.
I prefer cooperative games, am passionate about voter rights, and prefer abstract paintings.
I'm interested in smart contracts, prefer gothic novels, and am fascinated by archaeology.
I prefer organic architecture, am interested in piezoelectric energy, and prefer interdisciplinary projects.
I'm passionate about digital privacy, prefer conceptual sculptures, and am interested in nanotechnology.
I prefer documentary films, am fascinated by semiotics, and prefer futuristic fashion.
I'm interested in systems thinking, prefer management games, and am interested in glaciology.
I've lived in an intentional community, prefer project-based work, and support animal welfare organizations.
I'm studying philosophy, am curious about dark matter, and am a sugar glider enthusiast.
I enjoy researching Cold War history, prefer slow travel, and am the youngest grandchild.
I'm passionate about reproductive rights, prefer stormy weather, and collect vintage watches.
I'm most productive in the evening, have never had a television, and practice lucid dreaming.
I'm intrigued by neo-expressionism, prefer small-scale events, and am developing a mobile app.
I'm interested in circular fashion, am an axolotl lover, and prefer living in a desert region.
I'm interested in pantheism, prefer fall to any other season, and am passionate about noise pollution reduction.
I collect first edition books, prefer iced tea, and prefer Scandinavian design.
I'm a highly analytical person, a fan of alternate history fiction, and prefer subarctic climates.
I'm interested in pragmatics, am a breatharian, and am fascinated by topology.
I prefer peer-to-peer technologies, prefer spring to autumn, and am interested in Zoroastrianism.
I'm a chess enthusiast, prefer oceanic climates, and am interested in generative art.
I prefer van life, am interested in swarm robotics, and am a meteorite collector.
I prefer solo adventures, have never had a full-time job, and have never voted in an election.
I'm a language creator, am raised by a single parent, and am a rationalist.
I'm a digital nomad, work in the gig economy, and am politically green.
I'm a fifth-generation immigrant, have a name with historical significance, and am part of a multi-generational household.
I'm a Scorpio, am a climatarian, and prefer live performances.
I'm interested in neuroengineering, prefer ambient music, and am an amphibian person.
I prefer monochrome color schemes, am interested in wave energy, and prefer arthouse films.
I'm fascinated by synthetic genomics, prefer extreme sports, and am interested in hydroponics.
I prefer graphic novels, am passionate about universal basic income, and prefer tattoo art.
I'm interested in quantum cryptography, prefer found footage movies, and am fascinated by decision theory.
I prefer cyberpunk aesthetics, am interested in urban spelunking, and prefer legacy board games.
I'm passionate about net neutrality, prefer surrealist paintings, and am interested in decentralized finance.
I prefer epistolary novels, am fascinated by paleoanthropology, and prefer parametric architecture.
I'm interested in algae-based biofuel, prefer open-ended projects, and am passionate about right to repair.
I prefer interactive sculptures, am interested in biomimicry, and prefer mockumentary films.
I'm fascinated by ethnomethodology, prefer steampunk fashion, and am interested in complex systems.
I prefer city-building games, am interested in vulcanology, and have lived off-grid.
I prefer results-oriented work, support refugee assistance programs, and am studying linguistics.
I'm curious about antimatter, am a bearded dragon enthusiast, and enjoy studying Industrial Revolution history.
I prefer staycations, am the family historian, and am passionate about freedom of speech.
I prefer windy days, collect vintage playing cards, and am most productive at twilight.
I've never had a gym membership, practice stoic philosophy, and am intrigued by minimalist art.
I prefer virtual events, am writing a memoir, and am interested in zero-waste fashion.
I'm a tarantula enthusiast, prefer living in a valley, and am interested in secular Buddhism.
I prefer winter solstice to summer solstice, am passionate about light pollution awareness, and collect antique inkwells.
I prefer loose leaf tea, am interested in cynicism philosophy, and prefer brutalist design.
I'm a highly intuitive person, a fan of cli-fi (climate fiction), and am interested in discourse analysis.
I'm fascinated by graph theory, prefer distributed ledger technologies, and prefer equinoxes to solstices.
I'm interested in Jainism, am a mancala enthusiast, and prefer subtropical climates.
I'm interested in algorithmic art, prefer tiny house living, and am interested in biomechatronics.
I'm a sand collector, prefer solo exhibitions, and have never owned a television.
I have never had a favorite color, am a constructed language speaker, and am emancipated.
I'm a skeptic, a data nomad, and work in the sharing economy.
I'm politically anarchist, a sixth-generation immigrant, and part of a chosen family.
I'm an Aquarius, prefer silent retreats, and am interested in brain-to-brain interfaces.
I'm interested in dendrochronology, have lived in a co-housing community, and prefer value-based work.
I support digital literacy initiatives, am studying semiotics, and am curious about multiverse theory.
I enjoy studying post-war history, prefer micro-adventures, and am the family peacemaker.
I'm passionate about information freedom, collect vintage fountain pens, and am most productive during solar noon.
I've never had a credit score, practice stoicism, and am intrigued by abstract concepts.
I prefer virtual interactions, am writing an autobiography, and am interested in zero-waste living.
I prefer living in temperate climates, am passionate about noise pollution awareness, and collect antique keys.
I prefer herbal infusions, prefer minimalist lifestyles, and am a highly empathetic person.
I'm a fan of alternate history, prefer urban environments, and am interested in sociolinguistics.
I'm fascinated by network theory, prefer decentralized systems, and am a strategy game enthusiast.
I'm interested in algorithmic thinking, prefer communal living, and am interested in bioethics.
I'm a digital artifact collector, prefer solo activities, and have never owned a car.
I have never had a favorite number, am passionate about environmental conservation, and volunteer for a local charity.
I'm interested in astronomy, am an animal lover, and prefer staying in on weekends.
I'm an only child, am passionate about social justice issues, and prefer cloudy weather.
I collect postcards, have never owned a car, and practice meditation daily.
I'm fascinated by ancient history, prefer small gatherings to large parties, and am working on my first novel.
I'm interested in sustainable fashion, prefer living in the city, and am interested in local politics.
I prefer autumn to any other season, am passionate about renewable energy, and collect vinyl records.
I prefer tea to coffee, am interested in philosophy, and prefer minimalist design.
I'm an introvert, a fan of science fiction, and am interested in genealogy.
I'm a vegetarian, am fascinated by quantum physics, and am an early adopter of new technologies.
I prefer winter to summer, am interested in mindfulness practices, and am a history buff.
I prefer cold weather to hot weather, am interested in abstract art, and prefer urban living.
I'm interested in cryptocurrency, am an animal lover, and prefer solitude to socializing.
I have never been married, am interested in marine biology, and donate to environmental charities.
I'm studying political science, am fascinated by astrophysics, and enjoy learning about ancient civilizations.
I'm passionate about education reform, collect stamps, and have never had a credit card.
I'm intrigued by modern art, am writing a collection of short stories, and am interested in ethical fashion.
I prefer living in the suburbs, am interested in international relations, and am passionate about ocean conservation.
I collect model trains, am interested in ethics, and am a fan of fantasy novels.
I'm interested in linguistics, am a pescatarian, and am fascinated by string theory.
