# Supplementary material
Source: ML conference proceedings conference paper supplement (https://openreview.net/forum?id=ZJCSlcEjEn)
Supplement: supplementary_material [file prefs.xlsx]

## Sheet: TEST
Aaden loves birdwatching, tai chi, and street tacos
Blythe loves collecting vintage cameras, rock climbing, and molecular gastronomy
Ezra loves classic cars, meditation, and wild mushrooms
Fiona loves stained glass art, parkour, and spicy curries
Hazel loves practicing calligraphy, kayaking, and sustainable seafood
Iris loves astronomy, aerial silk performances, and homemade ice cream
Jasper loves collecting rare vinyl records, volunteering as a firefighter, and heirloom tomatoes
Lachlan loves board games, improv comedy, and fermented foods
Maren loves stop-motion animations, archery, and authentic ramen
Nolan loves antique clocks, caving, and spicy hot sauces
Rhys loves collecting unusual plants, historical reenactments, and regional barbecue
Seren loves mosaic art, falconry, and craft cocktails
Thalia loves escape rooms, long-distance swimming, and heirloom beans
Uri loves custom motorcycles, lucid dreaming, and kimchi
Vera loves vintage typewriters, aerial photography, and umami-rich foods
Zara loves urban sketching, hot air ballooning, and artisanal cheeses
Quentin loves vintage radios, stargazing, and spicy curries
Nyssa loves hybrid plants, interpretive dance, and gourmet chocolate
Leander loves collecting antique maps, scuba diving, and wood-fired pizza
Imogen loves terrariums, acrobatics, and exotic fruit smoothies
Thaddeus loves composing electronic music, bouldering, and slow-cooked stews
Elowen loves bookbinding, trapeze arts, and homemade ice cream
Rafferty loves wire sculptures, parkour, and savory crepes
Saskia loves cryptozoology, aerial silks, and fusion cuisine
Orion loves vintage motorcycles, fire spinning, and truffle-infused dishes
Lyra loves miniature dioramas, slack lining, and gourmet popcorn
Zephyr loves beekeeping, kite surfing, and artisanal bread
Amara loves sustainable fashion, contortionism, and exotic teas
Caspian loves falconry, cave exploring, and aged whiskeys
Penelope loves natural dyes, ice sculpting, and farm-to-table produce
Silas loves custom keyboards, unicycling, and molecular gastronomy
Isolde loves antique dolls, tightrope walking, and rare spices
Caius loves latte art, free diving, and fermented foods
Zinnia loves ancient scripts, glass blowing, and heirloom tomatoes
Evander loves board games, sky diving, and artisanal honey
Calliope loves perfumes, poi dancing, and aged balsamic vinegar
Lysander loves micro-robots, canyoneering, and wild mushroom foraging
Octavia loves vintage pinball machines, sword swallowing, and raw honey
Arden loves botanical illustrations, highlining, and barrel-aged spirits
Thorin loves escape rooms, wingsuit flying, and rare teas
Elodie loves glassblowing, tornado chasing, and craft beer
Zephyrine loves shadow puppets, freediving, and smoked meats
Atlas loves collecting rare insects, sandboarding, and artisanal cheeses
Saffron loves vintage synthesizers, ice climbing, and truffle hunting
Peregrine loves tiny houses, hula hooping, and sourdough bread
Akira loves mosaic art, stargazing, and artisanal cheese
Zainab loves eco-friendly furniture, mountain biking, and homemade ice cream
Yannick loves quantum physics, photography, and gourmet coffee
Mei-Ling loves vintage radios, yoga, and slow-cooked stews
Rashid loves writing science fiction novels, rock climbing, and exotic fruit smoothies
Ingeborg loves custom motorcycles, birdwatching, and wild mushroom foraging
Takeshi loves virtual reality games, urban gardening, and aged balsamic vinegar
Nuria loves marine biology, salsa dancing, and cold brew coffee
Kwesi loves sustainable fashion, kayaking, and homemade pasta
Anastasia loves composing electronic music, scuba diving, and artisanal bread
Ibrahim loves cultivating rare orchids, woodworking, and smoked cheeses
Celeste loves antique clocks, surfing, and truffle hunting
Ryu loves digital art, origami, and fermented foods
Astrid loves astrophysics, glassblowing, and barrel-aged spirits
Tariq loves board games, tai chi, and heirloom tomatoes
Zora loves micro wind turbines, pottery, and rare teas
Pavel loves perfumes, parkour, and molecular gastronomy
Amara loves cryptography, oil painting, and artisanal ice cream
Sanjay loves smart home systems, juggling, and sourdough bread
Yuki loves vintage synthesizers, bouldering, and cold-pressed juices
Catalina loves kinetic sculptures, aerial silks, and wild-caught salmon
Dmitri loves particle physics, foraging, and aged whiskey
Fatima loves virtual reality environments, ballet, and raw honey
Mateo loves custom guitars, beekeeping, and kombucha brewing
Leilani loves stop-motion animations, hula dancing, and wood-fired pizza
Youssef loves neuroscience, calligraphy, and artisanal chocolates
Xiu Ying loves sustainable architecture, tai chi, and rare spices
Henrik loves antique maps, windsurfing, and craft beer
Aisha loves interactive art installations, aerial yoga, and fermented vegetables
Javier loves artificial intelligence, astrophotography, and aged vinegars
Natsuki loves modular synthesizers, ikebana, and gourmet popcorn
Omar loves autonomous drones, sandboarding, and single-origin coffee
Zarina loves augmented reality art, bellydancing, and truffle-infused dishes
Soren loves quantum computing, beekeeping, and artisanal cheeses
Aditi loves eco-friendly packaging, crochet, and heirloom vegetables
Giuseppe loves vintage typewriters, bocce, and wild honey
Mei-Lin loves holographic installations, qigong, and slow-cooked stews
Nikolai loves dark matter, ice fishing, and cold-pressed juices
Esmeralda loves tiny houses, flamenco dancing, and aged balsamic vinegar
Wei loves bio-art, tai chi, and artisanal bread
Freya loves wearable tech, kayaking, and rare mushroom foraging
Hassan loves marine archaeology, falconry, and barrel-aged spirits
Yuki loves interactive soundscapes, ikebana, and homemade pasta
Lars loves vintage pinball machines, sailing, and craft cocktails
Priya loves AI-powered robots, bharatanatyam dancing, and fermented foods
Hiroto loves exoplanets, bonsai cultivation, and artisanal ice cream
Ingrid loves virtual ecosystems, knitting, and heirloom tomatoes
Rafael loves quantum computers, capoeira, and aged whiskey
Nadia loves sustainable transportation, acro yoga, and wild-caught salmon
Bjorn loves generative art, ice sculpting, and sourdough bread
Zahra loves particle physics, henna art, and raw honey
Akio loves vintage motorcycles, kendo, and kombucha brewing
Carmen loves neural interfaces, tango dancing, and artisanal chocolates
Liu Wei loves interactive holograms, tai chi fan, and rare spices
Khadija loves bioluminescence, mandala drawing, and wood-fired pizza
Esteban loves autonomous vehicles, flamenco guitar, and single-origin coffee
Saskia loves bio-inspired fashion, ice skating, and truffle-infused dishes
Raul loves quantum encryption systems, urban sketching, and craft beer
Yara loves theoretical physics, belly dancing, and fermented vegetables
Chen loves antique telescopes, kung fu, and aged vinegars
Amina loves virtual reality films, hula hooping, and gourmet popcorn
Raj loves modular homes, cricket, and artisanal cheeses
Ines loves dark energy, aerial arts, and heirloom vegetables
Alejandro loves micro fusion reactors, salsa dancing, and wild honey
Noor loves augmented reality games, parkour, and slow-cooked stews
Hiroshi loves quantum sensors, kyudo archery, and cold-pressed juices
Olga loves artificial intelligence, ballet, and aged balsamic vinegar
Jean-Pierre loves interactive textiles, fencing, and artisanal bread
Li Na loves sustainable cities, taiji, and rare mushroom foraging
Sven loves autonomous drones, glassblowing, and barrel-aged spirits
Amira loves bio-acoustic art, dabke dancing, and homemade pasta
Kofi loves quantum biology, djembe drumming, and craft cocktails
Svetlana loves neural interfaces, rhythmic gymnastics, and fermented foods
Paolo loves holographic music, soccer, and artisanal ice cream
Yara loves nanotechnology, poi spinning, and heirloom tomatoes
Ravi loves quantum computers, yoga, and aged whiskey
Ingeborg loves sustainable agriculture systems, Nordic walking, and wild-caught salmon
Carlos loves interactive sculptures, capoeira, and artisanal bread
Fatima loves dark matter, henna painting, and gourmet coffee
Akio loves vintage cameras, aikido, and fermented vegetables
Zara loves eco-friendly fashion, aerial silks, and truffle-infused dishes
Yannick loves virtual reality experiences, parkour, and aged balsamic vinegar
Mei loves marine ecology, tai chi, and artisanal cheeses
Rashid loves autonomous robots, calligraphy, and rare spices
Anastasia loves generative music, figure skating, and wild mushroom foraging
Kwame loves smart cities, djembe drumming, and single-origin coffee
Yuki loves quantum cryptography, kyudo archery, and homemade ice cream
Esperanza loves bio-luminescent art, flamenco, and slow-cooked stews
Dimitri loves antique books, chess, and craft beer
Amina loves AI algorithms, bellydancing, and artisanal chocolates
Tadashi loves particle physics, origami, and aged whiskey
Noor loves holographic fashion, yoga, and gourmet popcorn
Soren loves quantum sensors, kayaking, and fermented foods
Zainab loves neuroscience, mandala art, and wild honey
Chen loves modular synthesizers, tai chi fan, and rare teas
Isabella loves augmented reality murals, aerial yoga, and wood-fired pizza
Rajesh loves artificial intelligence, cricket, and artisanal bread
Olga loves vintage textiles, ballet, and aged vinegars
Kazuo loves sustainable buildings, hang gliding, and artisanal chocolates
Aaliyah loves marine microbiology, harp playing, and fermented tea
Esteban loves kinetic sculptures, freediving, and smoked meats
Natasha loves antique furniture, aerial photography, and sourdough bread
Kiran loves writing historical fiction, rock climbing, and craft cocktails
Helga loves custom bicycles, fire spinning, and aged cheeses
Tadashi loves augmented reality apps, bonsai cultivation, and cold brew coffee
Zoe loves quantum mechanics, acro-yoga, and wild berry foraging
Raul loves eco-friendly packaging, slack lining, and gourmet mushrooms
Amelia loves composing classical music, paragliding, and artisanal ice cream
Vikram loves cultivating rare succulents, capoeira, and spicy hot sauces
Linnea loves vintage audio equipment, ice skating, and homemade jams
Jun loves 3D printed art, parkour, and molecular gastronomy
Octavia loves cosmology, aerial silks, and herbal teas
Khalid loves smart textiles, sandboarding, and slow-cooked stews
Isolde loves virtual reality films, tightrope walking, and raw vegan desserts
Marius loves artificial intelligence, glassblowing, and artisanal breads
Yolanda loves miniature robots, flamenco dancing, and aged balsamic vinegar
Akio loves generative music, kite surfing, and rare fruit cultivation
Zara loves neuroscience, contortionism, and gourmet coffee roasting
Hugo loves sustainable transportation, poi spinning, and farmstead cheeses
Laila loves ancient artifacts, wingsuit flying, and fermented vegetables
Feng loves interactive light installations, tai chi, and artisanal tofu
Valentina loves renewable energy, trapeze arts, and heirloom tomatoes
Gunnar loves custom speakers, ice climbing, and craft beer brewing
Aisha loves digital sculptures, belly dancing, and exotic spice blending
Remy loves cryptography, slacklining, and molecular mixology
Indira loves wearable tech, kathak dancing, and artisanal chocolate making
Takumi loves vintage watches, kyudo archery, and sake brewing
Zoe loves bio-art installations, parkour, and wild honey harvesting
Matteo loves theoretical physics, urban sketching, and cold-pressed juices
Safiya loves modular furniture, aerial hoop, and sourdough bread baking
Nikolai loves quantum computers, figure skating, and coffee roasting
Lena loves stop-motion animations, pole dancing, and vegan cheese making
Diego loves marine archaeology, salsa dancing, and mezcal distilling
Yuki loves eco-friendly fashion, origami, and matcha tea ceremony
Amal loves holographic art, aerial yoga, and Middle Eastern pastry making
Felix loves dark matter, unicycling, and artisanal sausage making
Sonia loves classic cars, trapeze flying, and kombucha brewing
Rahul loves AI-generated poetry, cricket playing, and Indian pickle making
Ines loves virtual reality games, tango dancing, and olive oil production
Kenji loves string theory, sumo wrestling, and ramen noodle making
Zainab loves interactive murals, parkour, and traditional bread baking
Lars loves tiny houses, cross-country skiing, and aquavit distilling
Amara loves quantum biology, West African dance, and artisanal soap making
Thiago loves sustainable cities, capoeira, and coffee bean farming
Ling loves digital calligraphy, tai chi fan, and dim sum cooking
Dmitry loves Soviet-era electronics, ice fishing, and kvass brewing
Zoe loves bioluminescence, aerial straps, and tropical fruit cultivation
Hassan loves AI-powered prosthetics, falconry, and date syrup making
Nina loves virtual ecosystems, contemporary dance, and truffle hunting
Rodrigo loves volcanology, samba dancing, and cachaça distilling
Yara loves smart home systems, poi dancing, and za'atar blending
Akihiro loves robotic art, kendo, and wagashi confectionery
Leila loves particle physics, aerial silks, and rose water distilling
Oscar loves custom drones, tango dancing, and yerba mate cultivation
Amina loves wearable sculptures, Moroccan dance, and argan oil production
Sven loves glaciology, ice sculpting, and cloudberry jam making
Priya loves sustainable fashion, Bollywood dancing, and chai blending
Javier loves ancient musical instruments, flamenco guitar, and sangria mixing
Mei-Ling loves augmented reality exhibitions, tai chi, and oolong tea processing
Aiden loves renewable energy, hurling, and whiskey distilling
Fatima loves modular architecture, whirling dervish dancing, and baklava baking
Ryo loves AI-generated manga, sumo wrestling, and miso fermentation
Astrid loves quantum computing, Nordic walking, and lingonberry preserving
Kwame loves solar-powered devices, Afrobeat dancing, and palm wine brewing
Zhenya loves holographic fashion shows, rhythmic gymnastics, and kvass brewing
Santiago loves marine conservation, surfing, and pisco distilling
Amira loves eco-friendly packaging, belly dancing, and date palm cultivation
Hiroshi loves interactive soundscapes, aikido, and sake brewing
Ingrid loves dark energy, figure skating, and aquavit distilling
Tariq loves autonomous robots, parkour, and cardamom coffee brewing
Lulu loves virtual reality theater, contemporary dance, and kombucha brewing
Viktor loves nanotechnology, chess playing, and vodka distilling
Zara loves smart textiles, Bollywood dancing, and saffron cultivation
Akira loves generative art, karate, and matcha tea ceremony
Nadia loves neuroscience, aerial hoop, and halva making
Rafael loves vintage motorcycles, capoeira, and cachaca distilling
Yoko loves sustainable jewelry, butoh dancing, and miso fermentation
Andrei loves quantum encryption systems, ice yachting, and kvass brewing
Laila loves bio-luminescent installations, whirling dervish dancing, and rosewater distilling
Mateo loves artificial intelligence, flamenco dancing, and olive oil production
Aisha loves virtual reality games, pole dancing, and date syrup making
Ravi loves robotic dance performances, yoga, and masala chai blending
Elke loves marine mammals, figure skating, and herbal liqueur making
Yusuf loves sustainable greenhouses, Sufi whirling, and Turkish coffee brewing
Chiyo loves digital kimonos, aikido, and umeshu plum wine making
Alejandro loves renewable energy, salsa dancing, and mezcal distilling
Zina loves modular furniture, aerial silks, and harissa paste making
Dmitri loves antique samovars, cossack dancing, and kvass brewing
Mei loves AI-generated Chinese calligraphy, tai chi, and pu-erh tea aging
Soren loves quantum cryptography, viking reenactment, and aquavit distilling
Amira loves eco-friendly architecture, raqs sharqi dancing, and rosewater distilling
Takashi loves interactive manga experiences, kendo, and shochu distilling
Freya loves astrophysics, Nordic skiing, and cloudberry liqueur making
Carlos loves autonomous drones, capoeira, and coffee bean roasting
Zainab loves virtual reality museums, Moroccan dance, and argan oil production
Igor loves particle acceleration, chess boxing, and vodka infusing
Leilani loves sustainable swimwear, hula dancing, and poi making
Hiroto loves AI-composed music, sumo wrestling, and sake brewing
Anastasia loves quantum biology, rhythmic gymnastics, and kvass brewing
Raul loves vintage synthesizers, tango dancing, and yerba mate cultivation
Fatima loves interactive textile art, Sufi whirling, and rosewater distilling
Yuki loves smart city systems, kyudo archery, and umeshu plum wine making
Zora loves dark matter, contemporary dance, and rakija distilling
Ahmed loves solar-powered vehicles, parkour, and cardamom coffee brewing
Ingeborg loves virtual reality operas, Nordic walking, and aquavit distilling
Takeshi loves artificial general intelligence, karate, and shochu distilling
Nour loves sustainable fashion, dabke dancing, and za'atar blending
Mathias loves kinetic wind sculptures, ice yachting, and akvavit distilling
Amina loves neurotechnology, Moroccan dance, and argan oil production
Ryo loves quantum computers, kendo, and sake brewing
Zarina loves holographic fashion, kathak dancing, and saffron cultivation
Sven loves glaciology, biathlon, and lingonberry wine making
Priya loves AI-powered prosthetics, Bharatanatyam dancing, and masala chai blending
Diego loves ancient Incan artifacts, capoeira, and pisco distilling
Yoko loves bio-art installations, butoh dancing, and matcha tea ceremony
Nikolai loves plasma physics, chess playing, and kvass brewing
Aida loves virtual reality theaters, flamenco dancing, and olive oil production
Kenji loves robotic sushi chefs, sumo wrestling, and wasabi cultivation
Astrid loves quantum entanglement, ice skating, and cloudberry jam making
Jamal loves autonomous sailboats, parkour, and date syrup making
Lena loves AI-generated symphonies, aerial silks, and vodka infusing
Rafael loves marine bioluminescence, capoeira, and cachaca distilling
Zoe loves eco-friendly tiny homes, contemporary dance, and kombucha brewing
Akira loves virtual reality zen gardens, aikido, and green tea cultivation
Nadia loves dark energy, pole dancing, and rosewater distilling
Mateo loves solar-powered airships, salsa dancing, and mezcal distilling
Yara loves interactive light sculptures, belly dancing, and za'atar blending
Soren loves quantum computing, viking reenactment, and aquavit distilling
Amira loves sustainable skyscrapers, whirling dervish dancing, and baklava baking
Hiro loves AI-generated haiku, kyudo archery, and sake brewing
Freya loves exoplanets, Nordic skiing, and lingonberry wine making
Carlos loves quantum encryption networks, flamenco guitar, and coffee roasting
Zainab loves augmented reality textiles, Moroccan dance, and argan oil production
Dmitry loves antimatter, chess boxing, and kvass brewing
Leilani loves smart surfboards, hula dancing, and poi making
Takumi loves robotic tea ceremony masters, sumo wrestling, and wasabi cultivation
Astrid loves quantum biology, figure skating, and cloudberry liqueur making
Kwame loves AI-powered drumming robots, Afrobeat dancing, and palm wine brewing
Zhenya loves holographic ballet performances, rhythmic gymnastics, and vodka distilling
Santiago loves marine acoustics, surfing, and pisco sour mixing
Amira loves modular desert homes, raqs sharqi dancing, and date palm cultivation
Hiroshi loves interactive calligraphy installations, kendo, and umeshu plum wine making
Ingrid loves dark matter detection, biathlon, and aquavit distilling
Tariq loves autonomous desert vehicles, parkour, and cardamom coffee brewing
Lulu loves virtual reality coral reefs, contemporary dance, and kombucha brewing
Viktor loves quantum cryptography, chess playing, and horseradish vodka infusing
Zara loves smart saris, Kathak dancing, and saffron cultivation
Akira loves generative anime art, karate, and matcha tea ceremony
Nadia loves brain-computer interfaces, aerial hoop, and rosewater distilling
Rafael loves vintage Vespas, capoeira, and limoncello making
Yoko loves sustainable bamboo architecture, butoh dancing, and sake brewing
Andrei loves quantum radar systems, ice yachting, and birch sap fermenting
Laila loves bio-luminescent fashion, Sufi whirling, and orange blossom water distilling
Mateo loves swarm robotics, flamenco dancing, and olive oil production
Aisha loves virtual reality theme parks, pole dancing, and date syrup making
Ravi loves AI-generated ragas, yoga, and masala chai blending
Elke loves Arctic marine ecology, curling, and herbal schnapps making
Yusuf loves vertical hydroponic farms, Mevlevi whirling, and Turkish coffee brewing
Chiyo loves digital kimono patterns, aikido, and yuzu liqueur making
Alejandro loves fusion energy, salsa dancing, and agave syrup production
Zina loves shape-shifting furniture, aerial silks, and harissa paste making
Dmitri loves Cold War-era computers, Cossack dancing, and birch sap fermenting
Mei loves AI-generated Chinese landscapes, tai chi, and pu-erh tea aging
Soren loves quantum teleportation, axe throwing, and elderflower wine making
Amira loves self-sustaining desert communities, Moroccan dance, and argan oil production
Takashi loves interactive haiku generators, kendo, and yuzu liqueur making
Freya loves gravitational waves, glacier hiking, and sea buckthorn jam making
Carlos loves solar-powered vertical farms, capoeira, and cold brew coffee making
Zainab loves virtual reality souks, henna art, and rosewater distilling
Igor loves antimatter propulsion, chess boxing, and beet kvass brewing
Leilani loves wave-powered generators, Tahitian dance, and coconut oil production
Hiroto loves AI-generated kabuki plays, sumo wrestling, and wasabi cultivation
Anastasia loves quantum consciousness, rhythmic gymnastics, and sea buckthorn liqueur making
Raul loves Art Deco radios, tango dancing, and mate gourd crafting
Fatima loves interactive prayer rug designs, Sufi whirling, and date molasses making
Yuki loves earthquake-resistant pagodas, kyudo archery, and yuzu marmalade making
Aziz loves urban gardening, pottery, and spicy curries
Bronwyn loves marine biology, rock climbing, and artisanal cheeses
Chidi loves eco-friendly furniture, photography, and sushi
Dagmar loves writing mystery novels, yoga, and dark chocolate
Emir loves vintage cars, birdwatching, and barbecue ribs
Fleur loves digital art, kayaking, and French pastries
Goran loves astrophysics, playing guitar, and spicy tacos
Hana loves sustainable fashion, ballet, and matcha lattes
Ismail loves custom drones, stargazing, and falafel
Jokubas loves composing electronic music, hiking, and wood-fired pizza
Kasia loves urban sketching, aerial silks, and tiramisu
Laszlo loves quantum computing, juggling, and goulash
Malaika loves mosaic art, surfing, and mango smoothies
Niamh loves antique books, fencing, and shepherd's pie
Orhan loves virtual reality games, tai chi, and baklava
Paloma loves neuroscience, salsa dancing, and paella
Qadira loves kinetic sculptures, mountain biking, and hummus
Ruben loves tiny houses, parkour, and ceviche
Saoirse loves writing science fiction, archery, and Irish stew
Thandiwe loves sustainable architecture, African drumming, and jollof rice
Umut loves artificial intelligence, windsurfing, and Turkish delight
Valentina loves vintage synthesizers, figure skating, and tiramisu
Wojciech loves virtual reality art, chess, and pierogi
Xiomara loves marine conservation, capoeira, and churros
Yannick loves smart home systems, rock climbing, and croissants
Zuzanna loves stop-motion animations, ice skating, and borscht
Aarav loves renewable energy, cricket, and butter chicken
Beatriz loves eco-friendly packaging, tango dancing, and açaí bowls
Cian loves antique clocks, parkour, and Irish soda bread
Daphne loves perfumes, hula hooping, and Greek salad
Estevan loves particle physics, soccer, and empanadas
Fiona loves board games, kayaking, and haggis
Guillermo loves custom guitars, salsa dancing, and tapas
Hessa loves digital illustrations, falconry, and machboos
Ioan loves marine geology, rugby, and Welsh cakes
Janna loves modular furniture, ballet, and stroopwafels
Kadri loves interactive installations, volleyball, and köfte
Liam loves cryptography, surfing, and fish and chips
Mira loves vintage cameras, aerial yoga, and falafel
Niko loves autonomous vehicles, parkour, and moussaka
Olga loves virtual reality films, ice climbing, and borscht
Panos loves quantum mechanics, basketball, and souvlaki
Quynh loves sustainable fashion, tai chi, and pho
Rhiannon loves augmented reality art, horseback riding, and Welsh rarebit
Soren loves micro wind turbines, sailing, and smørrebrød
Talia loves neurobiology, contemporary dance, and shakshuka
Ulrich loves antique radios, hang gliding, and schnitzel
Varsha loves AI-generated poetry, kathak dancing, and dosa
Willem loves smart cities, speed skating, and stroopwafels
Xue loves dark matter, table tennis, and dim sum
Yasmin loves holographic art, belly dancing, and tabbouleh
Zoran loves custom drones, water polo, and ćevapi
Ananya loves quantum cryptography, yoga, and masala chai
Bjorn loves eco-friendly furniture, cross-country skiing, and gravlax
Catalina loves vintage motorcycles, tango dancing, and empanadas
Darius loves virtual reality games, parkour, and kebabs
Eira loves marine biology, harp playing, and Welsh cawl
Ferenc loves modular synthesizers, chess, and goulash
Greta loves bio-art installations, ice skating, and lingonberry jam
Hamza loves astrophysics, soccer, and shawarma
Ines loves sustainable architecture, flamenco dancing, and gazpacho
Jabulani loves digital music, long-distance running, and bobotie
Kiran loves artificial intelligence, cricket, and biryani
Linh loves smart textiles, tai chi, and pho
Maeve loves stop-motion animations, Irish dancing, and boxty
Nasser loves autonomous robots, falconry, and manakish
Orla loves neuroscience, hurling, and Irish stew
Pavlo loves antique furniture, chess, and borscht
Qadira loves interactive art, belly dancing, and mansaf
Radu loves quantum computing, soccer, and sarmale
Sasha loves virtual reality environments, ballet, and beef stroganoff
Thabo loves digital art, drumming, and chakalaka
Uma loves particle physics, bharatanatyam dancing, and dosa
Viggo loves custom bicycles, viking chess, and smørrebrød
Wanjiru loves augmented reality apps, marathon running, and ugali
Xiang loves artificial intelligence, tai chi, and hot pot
Yara loves sustainable fashion, dabke dancing, and falafel
Zain loves interactive music installations, cricket, and biryani
Aditi loves marine conservation, yoga, and paneer tikka
Bastien loves eco-friendly packaging, parkour, and ratatouille
Ciara loves vintage typewriters, Irish step dancing, and colcannon
Dragan loves virtual reality films, water polo, and sarma
Esther loves quantum mechanics, salsa dancing, and jollof rice
Fabian loves custom speakers, soccer, and schnitzel
Gizem loves digital sculptures, oil wrestling, and Turkish delight
Hector loves renewable energy, capoeira, and ceviche
Ines loves modular homes, flamenco dancing, and paella
Jakub loves AI-generated art, ice hockey, and pierogi
Khadija loves neurobiology, Moroccan dance, and tagine
Luka loves smart cities, water polo, and burek
Maia loves holographic fashion, aerial silks, and feijoada
Niall loves cryptography, Gaelic football, and boxty
Olena loves antique dolls, rhythmic gymnastics, and borscht
Piotr loves quantum computers, ski jumping, and pierogi
Qian loves interactive light installations, tai chi, and dim sum
Roisin loves marine biology, Irish dancing, and coddle
Stefan loves autonomous drones, handball, and sarma
Tessa loves bio-art, figure skating, and stroopwafels
Usman loves artificial intelligence, cricket, and nihari
Vivienne loves sustainable jewelry, ballet, and coq au vin
Wiktoria loves virtual reality games, pole vaulting, and pierogi
Xiuying loves dark energy, tai chi, and mapo tofu
Yahya loves smart home systems, parkour, and shawarma
Zuzana loves stop-motion animations, ice skating, and svíčková
Anika loves quantum biology, bharatanatyam dancing, and dal makhani
Bogdan loves eco-friendly furniture, soccer, and sarmale
Chloe loves vintage radios, contemporary dance, and quiche lorraine
Daniil loves digital music, chess, and beef stroganoff
Esmée loves astrophysics, figure skating, and poffertjes
Fiadh loves interactive murals, Irish dancing, and boxty
Hanan loves sustainable fashion, dabke dancing, and molokhia
Isidora loves neuroscience, tango dancing, and asado
Jelena loves augmented reality art, rhythmic gymnastics, and ajvar
Kamal loves renewable energy, parkour, and shakshuka
Lotta loves modular synthesizers, orienteering, and kanelbullar
Mateo loves virtual reality films, soccer, and arepas
Noemi loves marine conservation, flamenco dancing, and gazpacho
Otis loves custom guitars, surfing, and fish and chips
Petra loves bio-luminescent art, cross-country skiing, and svíčková
Roxana loves smart textiles, Romanian folk dancing, and sarmale
Soren loves interactive sound installations, handball, and smørrebrød
Tana loves quantum computing, hula dancing, and poke
Ulf loves vintage motorcycles, ice yachting, and gravlax
Valentina loves holographic art, rhythmic gymnastics, and borscht
Wayan loves eco-friendly buildings, Balinese dancing, and nasi goreng
Xolani loves particle physics, soccer, and chakalaka
Yasemin loves digital illustrations, oil wrestling, and manti
Zoran loves autonomous robots, water polo, and ćevapi
Amara loves marine biology, West African dance, and jollof rice
Bjarne loves virtual reality games, curling, and frikadeller
Catalina loves antique books, salsa dancing, and ajiaco
Demetrios loves AI-generated music, Greek wrestling, and moussaka
Eira loves quantum mechanics, harp playing, and cawl
Fatoumata loves sustainable fashion, djembe drumming, and mafe
Gunnar loves custom drones, Nordic skiing, and lutefisk
Halima loves interactive art installations, Moroccan dance, and tajine
Joanna loves modular furniture, pole dancing, and pierogi
Kenji loves virtual reality environments, kendo, and takoyaki
Lilja loves dark matter, figure skating, and kjötsúpa
Mihai loves vintage computers, soccer, and sarmale
Nadine loves bio-art, contemporary dance, and raclette
Oskar loves quantum encryption systems, ice hockey, and köttbullar
Quentin loves smart cities, parkour, and cassoulet
Sven loves renewable energy, orienteering, and surströmming
Talia loves interactive music installations, aerial silks, and shakshuka
Umair loves autonomous vehicles, cricket, and nihari
Vera loves marine conservation, ballet, and borscht
Wilhelm loves custom synthesizers, biathlon, and spätzle
Xia loves digital art, tai chi, and mapo tofu
Yasmine loves quantum biology, Moroccan dance, and harira
Zeki loves eco-friendly architecture, oil wrestling, and lahmacun
Aadhav loves wearable tech, rock climbing, and spicy foods
Bianka loves geology, modern dance, and fruit smoothies
Caspian loves interactive sculptures, scuba diving, and seafood
Delia loves vintage bicycles, yoga, and pastries
Einar loves computers, woodworking, and grilled meats
Farida loves linguistics, photography, and vegetarian cuisine
Gunvor loves virtual reality games, hiking, and hearty soups
Hakim loves sustainable transportation, martial arts, and street food
Ioana loves physics, folk dance, and comfort foods
Juhani loves electronic music, winter sports, and fish dishes
Kenza loves architecture, painting, and spicy stews
Leopold loves marine science, skiing, and sweet desserts
Meredith loves art installations, archery, and home-baked goods
Nándor loves drones, swimming, and savory pastries
Odette loves cryptography, ballet, and cheese dishes
Pasha loves textiles, chess, and dumplings
Quinta loves murals, martial arts, and bean dishes
Ragnar loves geology, strength training, and fermented foods
Sanaa loves eco-friendly packaging, dancing, and stuffed pastries
Tibor loves soundscapes, canoeing, and sweet breads
Ursula loves marine biology, ice skating, and potato dishes
Vihaan loves robots, team sports, and street snacks
Winona loves digital storytelling, lacrosse, and flatbreads
Xavi loves renewable energy, soccer, and rice dishes
Yalda loves jewelry, meditation, and herb-infused stews
Zoltán loves musical instruments, water sports, and pastries
Amelia loves biology, aerial arts, and meringue desserts
Bojan loves video games, handball, and grilled meats
Cora loves furniture, hula hooping, and cheesy dishes
Dragan loves physics, wrestling, and pickled vegetables
Esmee loves digital art, skating, and mini pancakes
Farhan loves smart home systems, cricket, and slow-cooked stews
Grete loves ecology, cross-country skiing, and lamb dishes
Hamid loves vehicles, parkour, and herb-rich stews
Ines loves textiles, Latin dance, and egg dishes
Jovan loves artificial intelligence, water sports, and grilled meats
Kasia loves buildings, pole fitness, and cabbage-based dishes
Leif loves digital art, board games, and cured fish
Mariam loves astronomy, belly dancing, and stuffed vegetables
Niklas loves bicycles, ice hockey, and pickled fish
Oana loves animations, gymnastics, and sweet breads
Paulo loves computer science, martial arts, and bean stews
Quan loves fashion, tai chi, and noodle soups
Rania loves digital art, belly dancing, and sweet cheese pastries
Soren loves renewable energy, handball, and open-faced sandwiches
Thalia loves virtual spaces, contemporary dance, and layered casseroles
Ulrich loves synthesizers, skiing, and egg noodle dishes
Vera loves neuroscience, figure skating, and hearty soups
Wojtek loves poetry, weightlifting, and cabbage rolls
Xue loves urban spaces, martial arts, and spicy broths
Yasmin loves marine biology, classical dance, and aromatic rice dishes
Zoran loves cameras, water polo, and stuffed vegetables
Annika loves sculptures, orienteering, and cinnamon rolls
Brahim loves computer science, drumming, and slow-cooked stews
Ciara loves clothes, Irish dancing, and potato pancakes
Drago loves drones, bocce ball, and risotto
Elina loves physics, figure skating, and savory pies
Firas loves documentaries, parkour, and flatbreads
Gemma loves packaging, flamenco, and seafood dishes
Hassan loves astrophysics, falconry, and rice-based meals
Iva loves music installations, rhythmic gymnastics, and stuffed vegetables
Joko loves robots, martial arts, and spicy beef dishes
Katarina loves marine biology, folk dancing, and meat rolls
Liam loves augmented reality games, hurling, and potato dishes
Mila loves buildings, ballet, and dumplings
Nikos loves engineering, wrestling, and layered dishes
Olga loves digital art, ice skating, and hearty soups
Pietro loves musical instruments, historical sports, and slow-cooked meats
Quynh loves biology, puppetry, and noodle soups
Radu loves textiles, handball, and stuffed cabbage rolls
Svetlana loves holograms, gymnastics, and meat-filled dumplings
Tarek loves cryptography, parkour, and rice dishes
Ursula loves transportation systems, curling, and potato pancakes
Vasco loves sculptures, surfing, and sandwiches
Wanda loves physics, aerial arts, and filled dumplings
Xiomar loves virtual environments, martial arts, and corn-based dishes
Yuki loves AI art, archery, and savory pancakes
Zuzana loves ecology, figure skating, and hearty soups
Amir loves smart gadgets, mountain biking, and grilled vegetables
Britta loves oceanography, contemporary dance, and fish tacos
Cheng loves virtual reality experiences, tai chi, and dim sum
Dasha loves antique furniture, aerial silks, and creamy soups
Eamon loves electric vehicles, rugby, and shepherd's pie
Fatma loves genetics, calligraphy, and stuffed grape leaves
Guillermo loves interactive installations, salsa dancing, and paella
Hana loves eco-friendly homes, rock climbing, and sushi
Ivan loves artificial intelligence, chess, and hearty stews
Jasmine loves digital animations, belly dancing, and falafel
Kostas loves solar-powered devices, water polo, and grilled octopus
Lila loves quantum physics, ballet, and vegetarian curries
Mateo loves custom motorcycles, parkour, and tapas
Nadine loves abstract paintings, yoga, and Mediterranean salads
Otto loves robotics, ice hockey, and schnitzel
Petra loves sustainable fashion, figure skating, and goulash
Quang loves 3D-printed art, badminton, and pho
Raisa loves astronomy, aerial hoop, and borscht
Udo loves material science, hang gliding, and bratwurst
Vivian loves smart home systems, rhythmic gymnastics, and sushi
Wei loves AI-generated music, tai chi, and hot pot
Xola loves renewable energy, soccer, and bobotie
Yara loves modular furniture, pole fitness, and falafel
Zain loves augmented reality games, squash, and biryani
Adela loves neuroscience, flamenco dancing, and gazpacho
Benoit loves eco-friendly transportation, fencing, and coq au vin
Camila loves interactive sculptures, capoeira, and ceviche
Dmitri loves quantum computing, chess boxing, and beef stroganoff
Esme loves wearable tech, aerial arts, and vegetarian lasagna
Farid loves digital music, parkour, and kebabs
Greta loves climate science, cross-country skiing, and lingonberry jam
Hiro loves robots, kendo, and ramen
Ines loves stop-motion animations, surfing, and paella
Jabari loves astrophysics, basketball, and jerk chicken
Kira loves sustainable architecture, contemporary dance, and sushi
Luka loves virtual reality films, water polo, and goulash
Mai loves marine biology, traditional dance, and pho
Orla loves interactive art installations, Irish dancing, and colcannon
Piotr loves particle physics, weightlifting, and pierogi
Qadira loves fashion accessories, belly dancing, and couscous
Raj loves AI algorithms, cricket, and butter chicken
Safiya loves renewable energy, parkour, and tagine
Tomas loves video games, ice hockey, and goulash
Uma loves digital sculptures, bharatanatyam dancing, and dosa
Viktor loves cybersecurity, chess, and borscht
Wen loves smart cities, tai chi, and dim sum
Xiang loves holographic art, table tennis, and hot pot
Yana loves genetics, rhythmic gymnastics, and borscht
Zafer loves electric vehicles, oil wrestling, and kebabs
