# Supplementary material
Source: ML conference proceedings conference paper supplement (https://openreview.net/forum?id=ZJCSlcEjEn)
Supplement: supplementary_material [file trivia.xlsx]

## Sheet: TEST
What is the tallest mountain in the world?
Who was the first president of the United States?
What is the hardest natural substance on Earth?
Who wrote "Moby Dick"?
What is the longest river in the world?
Who is known as the "Father of Computers"?
What is the capital of Australia?
Who painted the Sistine Chapel ceiling?
What is the largest desert in the world?
Who invented the telephone?
What is the capital of Egypt?
Who wrote "The Odyssey"?
What is the smallest bone in the human body?
Who developed the theory of relativity?
What is the currency of Japan?
Who discovered America?
What is the capital of India?
Who invented the light bulb?
What is the largest animal on Earth?
Who wrote "1984"?
What is the capital of China?
Who was the first man on the moon?
What is the deepest ocean?
Who wrote "Hamlet"?
What is the main ingredient in vodka?
Who was the first woman to win a Nobel Prize?
What is the tallest building in the world?
Who wrote "To Kill a Mockingbird"?
What is the capital of Spain?
Who discovered the structure of DNA?
What is the most abundant gas in the Earth's atmosphere?
Who wrote "The Great Gatsby"?
What is the highest-grossing film of all time?
Who was the first person to circumnavigate the globe?
What is the largest lake in the world?
Who wrote "The Catcher in the Rye"?
What is the capital of South Korea?
Who painted "Starry Night"?
What is the longest bone in the human body?
Who was the first female prime minister of the UK?
What is the capital of Argentina?
Who wrote "Jane Eyre"?
What is the largest ocean on Earth?
Who invented the airplane?
What is the capital of Saudi Arabia?
Who discovered radioactivity?
What is the national flower of Japan?
Who wrote "The Divine Comedy"?
What is the capital of Greece?
Who discovered gravity?
What is the main ingredient in pesto?
How many planets are in the solar system?
What is the capital of Canada?
What is the primary ingredient in chocolate?
How many states are in the USA?
What is the speed of sound?
What is the main ingredient in tofu?
How many oceans are there?
What is the main ingredient in paella?
What is the largest continent?
How many legs does a spider have?
What is the main ingredient in beer?
What is the capital of Russia?
How many teeth does an adult human have?
What is the main ingredient in mayonnaise?
How many days are in a leap year?
What is the primary ingredient in ketchup?
How many players are on a soccer team?
What is the capital of Mexico?
What is the main ingredient in bread pudding?
How many time zones are there in the world?
What is the primary ingredient in curry?
What is the capital of Brazil?
How many bones are in a cat's body?
What is the capital of Germany?
How many legs does a crab have?
What is the main ingredient in risotto?
How many bones are in a human hand?
What is the main ingredient in salsa?
How many hearts does an octopus have?
What is the primary ingredient in sushi rice?
How many stripes are on the US flag?
What is the main ingredient in cider?
How many elements are in the periodic table?
What is the main ingredient in cheesecake?
How many calories are in a gram of fat?
What is the primary ingredient in gin?
How many chambers are in the human heart?
What is the main ingredient in meringue?
How many weeks are in a year?
What is the main ingredient in sauerkraut?
How many moons does Mars have?
What is the primary ingredient in Caesar salad?
How many sides does a pentagon have?
What is the main ingredient in custard?
How many feet are in a mile?
What is the primary ingredient in fondue?
How many planets have rings?
What is the main ingredient in miso soup?
How many strings does a violin have?
What are three major types of bacteria?
Name three famous Greek philosophers.
What are the colors of the rainbow?
Name five famous cities in Italy.
What are three major religions in the world?
Name three ancient civilizations.
What are the three branches of the U.S. government?
Name five Nobel Prize categories.
What are three famous works by Beethoven?
Name three famous playwrights.
What are the primary colors of light?
Name three famous sculptures.
What are three major bones in the human body?
Name five planets in our solar system.
What are the three types of muscles in the human body?
Name five famous novels by Charles Dickens.
What are three major climate zones?
Name three famous rivers.
What are the three types of rock formations?
Name five famous monuments in the USA.
What are three types of renewable energy sources?
Name three major world oceans.
What are the layers of the Earth's atmosphere?
Name three famous American presidents.
What are three types of blood vessels?
Name five famous ancient wonders.
What are three types of natural disasters?
Name three major rivers in Africa.
What are three famous battlefields?
Name five famous European cities.
What are three major types of ecosystems?
Name three famous bridges.
What are the four cardinal directions?
Name three famous skyscrapers.
What are three types of symmetry?
Name three famous explorers.
What are the three main layers of the Earth?
Name five famous islands.
What are three major world deserts?
Name three famous ancient Roman structures.
What are the phases of the moon?
Name five famous US national parks.
What are three major world mountain ranges?
Name three famous inventors.
What are the four gas giants in our solar system?
Name three famous medieval castles.
What are three major types of volcanoes?
Name five famous cathedrals.
What are the five Great Lakes?
Name three famous ancient Greek structures.
What is the capital of France?
How many known fish species are there?
What is the largest planet in our solar system?
Who painted the Mona Lisa?
How many continents are there on Earth?
What is the tallest mountain in the world?
What is the smallest country by land area?
Who wrote "Romeo and Juliet"?
What is the capital of Japan?
How many elements are in the periodic table?
What is the speed of light?
What is the largest mammal on Earth?
What is the formula for water?
Who discovered penicillin?
What is the capital of Canada?
How many planets are in our solar system?
Who was the first President of the United States?
What is the smallest prime number?
How many chromosomes do humans have?
What is the capital of Argentina?
How many moons does Jupiter have?
What year did the French Revolution begin?
Who wrote "1984"?
How many degrees are in a right angle?
What is the hardest natural substance on Earth?
Who composed "Symphony No. 5"?
How many bones are in the human spine?
What is the capital of Mexico?
Who discovered radium?
What is the smallest planet in our solar system?
How many states are in the United States?
Who invented the steam engine?
What is the speed of sound in air?
How many chromosomes do chimpanzees have?
Who wrote "War and Peace"?
What is the capital of Turkey?
What is the most abundant element in the universe?
How many continents were there during the Pangaea period?
Who wrote "The Odyssey"?
What is the smallest ocean on Earth?
How many pairs of ribs does a human have?
Who discovered the structure of DNA?
What is the most common blood type in humans?
How many elements are in the noble gas group?
Who composed "The Magic Flute"?
What is the deepest cave system in the world?
How many bones are in the human foot?
Who discovered the planet Neptune?
What is the capital of New Zealand?
What is the key ingredient in bean soup?
What year did the Industrial Revolution begin?
How do you calculate the area of a circle?
What is the fastest land animal?
Who invented the telephone?
How many bones are in the human body?
What is the largest ocean on Earth?
What year did World War II end?
What is the longest river in the world?
What is the currency of Brazil?
Who painted "Starry Night"?
How many teeth does an adult human have?
What is the largest desert in the world?
What is the main ingredient in sushi?
What is the deepest point in the ocean?
What is the most abundant gas in Earth's atmosphere?
Who wrote "To Kill a Mockingbird"?
What is the capital of Australia?
How many faces does a cube have?
Who invented the light bulb?
What is the longest word in English?
What is the largest species of shark?
What is the smallest bone in the human body?
What is the main ingredient in hummus?
How many teeth does a great white shark have?
What is the boiling point of nitrogen?
Who wrote "The Catcher in the Rye"?
What is the deepest lake in the world?
How many keys are on a standard piano?
What is the main ingredient in pesto sauce?
Who painted "The Scream"?
What is the freezing point of water in Fahrenheit?
How many teeth does a cat have?
What is the largest island in the world?
Who composed "The Nutcracker"?
What is the longest river in Europe?
How many time zones does Australia have?
What is the largest species of penguin?
How many bones are in the human hand?
Who painted "Girl with a Pearl Earring"?
What is the highest waterfall in the world?
How many chambers does a human heart have?
What is the largest species of big cat?
Who invented the microscope?
What is the longest river in Africa?
How many players are on a baseball team?
What is the largest species of bear?
Who wrote "One Hundred Years of Solitude"?
What is the largest waterfall by volume?
How many vertices does a cube have?
What is the largest species of whale?
Who invented the periodic table?
What is the largest desert in North America?
How many time zones does Canada have?
What is the largest species of crocodile?
How many teeth does an adult dog have?
What are five popular garden flowers?
Who wrote the novel "Pride and Prejudice"?
What is the main function of the human liver?
What are the primary colors?
What is the difference between weather and climate?
What is photosynthesis?
What is the boiling point of water in Celsius?
How many time zones does Russia have?
What is the main ingredient in guacamole?
Who was the first person to walk on the moon?
How many players are on a soccer team?
What is the main language spoken in Egypt?
What is the national animal of Australia?
How many sides does a hexagon have?
Who wrote "The Theory of Relativity"?
What is the largest bird in the world?
How many Great Lakes are there in North America?
What is the main component of the Earth's core?
Who composed "The Four Seasons"?
What is the largest organ in the human body?
Who painted "The Persistence of Memory"?
How many strings does a violin have?
What is the capital of South Korea?
Who discovered gravity?
What is the largest country by land area?
How many time zones does China have?
What is the national flower of Japan?
Who invented the World Wide Web?
What is the largest moon of Saturn?
How many legs does a spider have?
What is the official language of Brazil?
Who wrote "The Great Gatsby"?
What is the capital of Egypt?
How many faces does a dodecahedron have?
What is the main ingredient in tofu?
Who discovered penicillin?
What is the national animal of India?
How many strings does a guitar have?
Who invented the telephone?
What is the main ingredient in mayonnaise?
Who discovered X-rays?
What is the capital of Nigeria?
How many sides does an octagon have?
What is the main component of natural gas?
Who painted "The Birth of Venus"?
What is the capital of Spain?
How many strings does a ukulele have?
What is the main ingredient in falafel?
Who invented the telescope?
What is the capital of Indonesia?
How many cards are in a standard deck?
What is the main ingredient in miso soup?
Who wrote "The Iliad"?
What is the national bird of the United States?
How many keys are on a standard computer keyboard?
Who invented the radio?
What is the most electronegative element?
How many known dwarf planets are in our solar system?
Who wrote "Moby-Dick"?
What is the smallest mammal in the world?
How many taste buds does the average human tongue have?
Who discovered the law of conservation of mass?
What is the most abundant metal in the Earth's crust?
What is the capital of Thailand?
How many bones are in a giraffe's neck?
What year did the American Civil War end?
Who discovered the theory of evolution?
How many time zones does Russia have?
Who painted "The Last Supper"?
What is the smallest planet in the solar system?
How many elements are in the halogen group?
What is the capital of Sweden?
Who composed "The Planets" suite?
What is the oldest known living tree species?
How many known moons does Saturn have?
Who discovered the law of gravity?
What is the most abundant isotope of hydrogen?
How many pairs of wings does a bee have?
Who wrote "The Hunchback of Notre-Dame"?
What is the smallest bone in the human body?
What is the capital of Finland?
How many hearts does an octopus have?
What year did World War I begin?
Who discovered radioactivity?
How many time zones does India have?
Who sculpted "David"?
What is the largest moon in our solar system?
How many elements are in the lanthanide series?
What is the capital of Austria?
Who composed "The Four Seasons"?
What is the oldest known living animal species?
How many known dwarf planets are there in our solar system?
Who discovered the law of electromagnetism?
What is the most abundant metal in the human body?
How many pairs of legs does a lobster have?
Who wrote "The Adventures of Huckleberry Finn"?
What is the smallest country in Africa?
What is the capital of Denmark?
How many tentacles does a squid have?
What year did the Renaissance begin?
Who discovered the neutron?
How many time zones does Japan have?
Who painted "The Creation of Adam"?
What is the second largest planet in our solar system?
How many elements are in the actinide series?
What is the capital of Iceland?
Who composed "Swan Lake"?
What is the oldest known flowering plant?
How many moons does Neptune have?
Who discovered the law of universal gravitation?
What is the most electronegative element?
How many pairs of wings does a dragonfly have?
Who wrote "The Tale of Genji"?
What is the smallest country in South America?
What is the capital of Norway?
How many arms does a starfish typically have?
What year did the Industrial Revolution end?
Who discovered the electron?
What is the oldest university in the world?
Who invented the ballpoint pen?
How many bones are in a human ear?
Who discovered the theory of relativity?
What is the smallest country in Asia?
Who painted "The Birth of Venus"?
How many known species of primates are there?
Who wrote "The Prince"?
What is the capital of Kazakhstan?
How many chambers does a nautilus shell have?
Who composed "The Rite of Spring"?
What is the oldest known written language?
Who discovered the structure of the solar system?
What is the capital of Cambodia?
How many known moons does Uranus have?
Who invented the first successful submarine?
How many hearts does a squid have?
Who wrote "The Art of War"?
What is the smallest bird in the world?
Who discovered the planet Uranus?
What is the capital of Lithuania?
How many known elements are synthetic?
Who invented the first successful helicopter?
How many pairs of legs does a centipede have?
Who wrote "The Republic"?
What is the oldest known fossil?
Who discovered the laws of planetary motion?
What is the capital of Uruguay?
How many known dwarf planets are in the Kuiper Belt?
Who invented the first successful airplane?
How many pairs of wings does a fruit fly have?
Who wrote "The Divine Comedy"?
What is the smallest reptile in the world?
Who discovered the structure of the atom?
What is the capital of Ecuador?
How many known moons does Pluto have?
Who invented the first successful bicycle?
What is the capital of Japan?
Who wrote "Pride and Prejudice"?
What is the largest planet in our solar system?
What year did the Titanic sink?
Who painted the Mona Lisa?
What is the smallest country in the world?
What year did World War II end?
Who discovered penicillin?
What is the currency of the United Kingdom?
Who painted "Guernica"?
What is the largest lake in Africa?
How many nodes does a binary tree with 15 leaves have?
What is the largest species of snake?
Who invented the barometer?
What is the longest river in South America?
How many strings does a cello have?
What is the largest species of eagle?
Who wrote "The Canterbury Tales"?
Who invented the telephone?
What is the largest lake in South America?
What is the fastest flying bird?
What is the main ingredient in tempeh?
What is the largest species of tuna?
How many strings does a banjo have?
What is the deepest trench in the ocean?
Who wrote "The Hobbit"?
What is the largest coral reef system?
How many chambers does a snail's heart have?
What is the largest species of lizard?
Who invented the computer mouse?
What is the longest river in Asia?
How many time zones does Brazil have?
What is the largest species of jellyfish?
Who painted "The Night Watch"?
What is the largest canyon in the solar system?
How many players are on a water polo team?
What is the largest species of owl?
Who discovered the double helix structure of DNA?
Who invented the wheel?
What is the largest waterfall in Europe?
What is the slowest moving land animal?
What is the main ingredient in natto?
What is the largest species of tortoise?
How many strings does a sitar have?
What is the highest mountain in North America?
Who wrote "The Brothers Karamazov"?
What is the largest freshwater lake by volume?
How many teeth does an adult rabbit have?
What is the largest species of frog?
Who invented the first successful airplane?
What is the longest river in North America?
How many time zones does Mexico have?
What is the largest species of sea turtle?
Who painted "The Garden of Earthly Delights"?
What is the largest impact crater on Earth?
How many players are on a cricket team?
What is the largest species of deer?
Who discovered the circulation of blood?
Who invented the first practical camera?
What is the largest glacier in Europe?
What is the fastest swimming fish?
What is the main ingredient in seitan?
What is the largest species of kangaroo?
How many strings does a balalaika have?
What is the highest mountain in South America?
Who wrote "Crime and Punishment"?
What is the largest lake in Europe?
How many hearts does a worm have?
What is the largest species of bat?
Who invented the first successful helicopter?
What is the longest river in Western Europe?
What is the largest species of ray?
Who sculpted "The Thinker"?
What is the largest volcano in the solar system?
How many players are on an American football team?
What is the largest species of antelope?
Who discovered the structure of benzene?
Who invented the first practical steam engine?
What is the largest archipelago in the world?
What is the most venomous snake?
What is the main ingredient in marmite?
How many teeth does a great white shark have?
What is the largest species of flying bird?
How many countries are in South America?
What is the deepest known cave on Earth?
What is the main ingredient in sake?
How many strings does a mandolin have?
What is the largest moon of Jupiter?
How many time zones does France have?
What is the largest desert in Asia?
How fast can a peregrine falcon dive?
Who discovered the laws of heredity?
What is the longest bridge in the world?
How many countries border Germany?
What is the largest species of crab?
How many teeth does an adult human have?
What is the largest lake in Africa?
How many pairs of ribs does a snake have?
What is the fastest land animal after the cheetah?
What is the main component of the Sun's core?
How many countries are in the European Union?
What is the largest canyon in Europe?
How fast does the Earth rotate on its axis?
How many chromosomes does a fruit fly have?
How many countries does the Nile River flow through?
What is the largest species of mosquito?
How many bones are in a shark's body?
What is the deepest point in the Mediterranean Sea?
What is the main component of natural gas?
How many time zones does Australia have?
What is the largest species of octopus?
How fast can a dragonfly fly?
How many countries are completely landlocked?
How many species of dolphins are there?
What is the largest flower in the world?
How many bones are in a human spine?
What is the deepest river in the world?
What is the main component of the Earth's lower mantle?
How many countries border China?
What is the largest species of shark?
How fast can a hummingbird's wings beat?
How many chromosomes does a potato have?
How many countries are in Africa?
What is the largest species of penguin?
How many bones are in a human hand?
What is the highest waterfall in Asia?
What is the main component of the Earth's atmosphere?
What is the main ingredient in sushi?
How many continents are there?
What is the key ingredient in guacamole?
What is the boiling point of water?
What is the most spoken language in the world?
What is the main ingredient in bread?
How many bones are in the human body?
What is the speed of light?
What is the largest mammal?
What is the main ingredient in hummus?
What is the main ingredient in tzatziki?
Who discovered insulin?
What is the capital of Vietnam?
How many dots are on a pair of dice?
What is the main component of the Earth's mantle?
Who painted "American Gothic"?
What is the capital of Morocco?
How many amendments are in the U.S. Constitution?
What is the main ingredient in kimchi?
Who wrote "The Count of Monte Cristo"?
How many faces does an icosahedron have?
What is the capital of Portugal?
Who invented the steam turbine?
What is the national animal of Scotland?
How many players are on an ice hockey team?
What is the main ingredient in baba ganoush?
Who discovered the structure of the atom?
How many strings does a harp typically have?
What is the main component of the Earth's atmosphere?
Who wrote "The Picture of Dorian Gray"?
What is the capital of Iran?
How many faces does a tetrahedron have?
What is the main ingredient in wasabi?
Who invented the first practical telephone?
What is the capital of Cuba?
How many chromosomes does a potato have?
What is the main ingredient in tahini?
Who wrote "The Old Man and the Sea"?
How many edges does a cube have?
What is the capital of Chile?
Who invented the steam locomotive?
What is the national animal of China?
How many players are on a volleyball team?
What is the main ingredient in sriracha sauce?
Who discovered the laws of planetary motion?
How many keys does a standard accordion have?
What is the main component of natural rubber?
Who wrote "Frankenstein"?
What is the capital of Ukraine?
How many faces does an octahedron have?
What is the main ingredient in gazpacho?
Who invented the first practical refrigerator?
What is the capital of Peru?
How many chromosomes does a banana have?
What is the main ingredient in aioli?
Who wrote "One Flew Over the Cuckoo's Nest"?
How many vertices does a tetrahedron have?
What is the capital of Belgium?
Who invented the first electric motor?
What is the national animal of Canada?
How many players are on a rugby union team?
What is the main ingredient in harissa?
Who discovered the laws of thermodynamics?
How many valves does a trumpet have?
What is the main component of glass?
Who wrote "The Metamorphosis"?
How many faces does a dodecahedron have?
What is the main ingredient in tapenade?
Who invented the first practical telephone?
What is the capital of Venezuela?
How many pairs of chromosomes does a dog have?
What is the main ingredient in gochujang?
Who wrote "The Grapes of Wrath"?
How many edges does an octahedron have?
What is the capital of Croatia?
What are the primary colors of light?
How does a nuclear reactor work?
Who wrote "The Odyssey"?
What causes the Earth's magnetic field?
How do optical illusions work?
What is the function of the hypothalamus?
How do plants respond to light?
Who invented the first electric light bulb?
What causes a lunar eclipse?
What is the main component of bone?
How do fireflies produce light?
Who invented the first computer program?
What causes ocean acidification?
How do vaccines work?
What is the main ingredient in soy sauce?
How do earthquakes cause tsunamis?
Who wrote "The Waste Land"?
What causes acid rain?
How do plants reproduce?
Who discovered the laws of motion?
What causes a rainbow?
What is the main ingredient in tofu?
Who invented the first successful elevator?
What causes the Coriolis effect?
How do black holes emit radiation?
Who wrote "One Hundred Years of Solitude"?
What causes muscle growth?
How do chameleons change color?
Who discovered the laws of electromagnetism?
What causes the aurora australis?
What is the main ingredient in ketchup?
Who invented the first successful radio?
What causes sinkholes?
How do birds navigate during migration?
Who wrote "The Sound and the Fury"?
What causes the greenhouse effect?
How do solar cells work?
Who discovered the structure of benzene?
What causes a mirage?
What is the main ingredient in mustard?
Who invented the first successful telephone?
What causes the Earth's seasons?
How do plants absorb water from the soil?
Who wrote "The Catcher in the Rye"?
What causes a solar eclipse?
How do bioluminescent organisms produce light?
What are the Seven Wonders of the Ancient World?
What are three major types of rock?
Name three famous painters from the Renaissance.
Name five countries that speak Spanish.
What are the primary colors?
Name five famous landmarks in Paris.
What are the names of the Great Lakes?
Name three types of clouds.
Name five Shakespeare plays.
What are three famous operas?
What is the tallest mountain in the world?
Who was the first president of the United States?
What is the hardest natural substance on Earth?
Who wrote "Moby Dick"?
What is the longest river in the world?
Who is known as the "Father of Computers"?
What is the capital of Australia?
Who painted the Sistine Chapel ceiling?
What is the largest desert in the world?
Who invented the telephone?
What is the capital of Egypt?
Who wrote "The Odyssey"?
What is the smallest bone in the human body?
What is the main ingredient in pesto?
How many planets are in the solar system?
What is the capital of Canada?
What is the primary ingredient in chocolate?
How many states are in the USA?
What is the speed of sound?
What is the main ingredient in tofu?
How many oceans are there?
What is the main ingredient in paella?
What is the largest continent?
How many legs does a spider have?
What is the main ingredient in beer?
What is the capital of Russia?
What are three major types of bacteria?
Name three famous Greek philosophers.
What are the colors of the rainbow?
Name five famous cities in Italy.
What are three major religions in the world?
Name three ancient civilizations.
What are the three branches of the U.S. government?
Name five Nobel Prize categories.
What are three famous works by Beethoven?
Name three famous playwrights.
What are the primary colors of light?
Name three famous sculptures.
What are three major bones in the human body?
